# Supplementary material for: Role of the major antigenic membrane protein in phytoplasma transmission by two insect vector species
Source: PubMed Central journal article supplement (PMC4589916; doi:10.1186/s12866-015-0522-5), 2015-09-30
Supplement: 12866_2015_522_MOESM3_ESM.pdf [file 12866_2015_522_MOESM3_ESM.pdf]

1                   **Phytoplasma quantification in ‘Transmitter’ and ‘Non-transmitter’ insects.**  
2

3 Mean ( $\pm$  standard error) chrysanthemum yellows phytoplasma (CYP) titre (CYP cells/ng of insect  
4 DNA) measured in *Euscelidius variegatus*, following microinjection with CYP suspension  
5 (Control) or CYP suspension plus antibody A416. Insects were collected at the end of the  
6 inoculation access period and classified as ‘Transmitters’ and ‘Non-transmitters’ according with  
7 symptom appearance on corresponding inoculated plants.  
8

| <b>Thesis</b> | <b>Insect transmission category</b> | <b>Mean CYP titre <math>\pm</math> SE (N)</b> |
|---------------|-------------------------------------|-----------------------------------------------|
| Control       | Transmitters                        | 2.17E+04 $\pm$ 5.13E+03 (9)                   |
| Antibody A416 | Non-transmitters                    | 2.79E+04 $\pm$ 2.81E+03 (9)                   |

9
