# Supplementary material for: Role of the major antigenic membrane protein in phytoplasma transmission by two insect vector species
Source: PubMed Central journal article supplement (PMC4589916; doi:10.1186/s12866-015-0522-5), 2015-09-30
Supplement: 12866_2015_522_MOESM4_ESM.pdf [file 12866_2015_522_MOESM4_ESM.pdf]

1  
2 **Phytoplasma quantification in dissected salivary glands.**  
3

4 Mean ( $\pm$  standard error) chrysanthemum yellows phytoplasma (CYP) titre (CYP cells/ng of insect  
5 DNA) measured by qPCR in thoroughly washed salivary glands of healthy *Euscelidius variegatus*  
6 following incubation (4 h) with CYP suspension alone (Control) or CYP suspension plus antibody  
7 A416, according to the protocol developed for the internalization assay.  
8

| <b>Thesis</b>       | <b>Mean <math>\pm</math> SE (N)</b> |
|---------------------|-------------------------------------|
| Control (CYP)       | 58.81 $\pm$ 13.41 (12)              |
| CYP + Antibody A416 | 55.81 $\pm$ 13.46 (12)              |

9  
10
